# Supplementary material for: Continental-Scale Assessment of Risk to the Australian Odonata from Climate Change
Source: PubMed Central journal article supplement (PMC3923880; doi:10.1371/journal.pone.0088958), 2014-02-13
Supplement: pone.0088958.s001.pdf [file pone.0088958.s001.pdf]

**Table S1 Sources of Australian Odonata Data**

| Source                                                                                    | Approximate # Records |
|-------------------------------------------------------------------------------------------|-----------------------|
| <b>Museums</b>                                                                            | <b>29,400</b>         |
| Australian Museum                                                                         | 1600                  |
| Australian National Insect Collection                                                     | 16100                 |
| National Museum of Victoria                                                               | 650                   |
| Northern Territory Museum                                                                 | 850                   |
| Queensland Museum                                                                         | 8600                  |
| Queen Victoria Museum and Art Gallery                                                     | 350                   |
| South Australian Museum                                                                   | 1000                  |
| Tasmanian Museum and Art Gallery                                                          | 150                   |
| Western Australian Museum                                                                 | 100                   |
| <b>Government</b>                                                                         | <b>15,450</b>         |
| Australian Plant Pest Database                                                            | 1500                  |
| Bush Blitz (see <a href="http://www.bushblitz.org.au/">http://www.bushblitz.org.au/</a> ) | 100                   |
| Georges River Catchment Authority                                                         | 200                   |
| Sydney Catchment Authority                                                                | 100                   |
| New South Wales Office of Environment and Heritage                                        | 7450                  |
| Queensland Department of Environment and Resource Management                              | 200                   |
| Department of Environment and Primary Industries                                          | 3100                  |
| Western Australia Department of Environment and Conservation                              | 2800                  |
| <b>Private</b>                                                                            | <b>13,300</b>         |
| Dennis Paulson                                                                            | 1450                  |
| Ian Endersby                                                                              | 450                   |
| Roger Garrison                                                                            | 350                   |
| Vincent Kalkman                                                                           | 400                   |
| Karen Sutcliffe (PhD thesis)                                                              | 1500                  |
| Nick Donnely                                                                              | 450                   |
| Fons Peels                                                                                | 450                   |
| Reiner Richter                                                                            | 3100                  |
| Gunther Theischinger                                                                      | 5150                  |
