# Supplementary material for: Continental-Scale Assessment of Risk to the Australian Odonata from Climate Change
Source: PubMed Central journal article supplement (PMC3923880; doi:10.1371/journal.pone.0088958), 2014-02-13
Supplement: pone.0088958.s002.pdf [file pone.0088958.s002.pdf]

**Table S2.** Model predictions for all species under emissions scenarion RCP8.5. The region code and record group dictate which group of variables were used to predict species habitat suitability (C=continental, N=north, NE=north-east, E=east, S=south and W=west). Model scores are for the True Skills Statistic (TSS) and area under the operating curve (AUC). Current range is the current extent of suitable habitat in km2.

For projections in 2055 and 2085 values indicate the percentage loss (Loss) and percentage (gain) in suitable habitat extent, the sum of the climate exposure score (C), whether the sensivity score was above one and considered vulnerable (S), the sum of dispersal score measurements (D), and the overall vulnerability class (V). Vulerability classes; vulnerable across all categories(1), combination of exposure and sensitivity (2), exposure and dispersal (3), dispersal and sensitivity(4), exposure only (5), sensitivity only (6), dispersal only (7) and not vulnerable for any category (0).

| Species                                                   | Region | Record Group | Model Score |       | Current Range | RCP85_2055 |      |     |   |   |   | RCP85_2085 |      |     |   |   |   |
|-----------------------------------------------------------|--------|--------------|-------------|-------|---------------|------------|------|-----|---|---|---|------------|------|-----|---|---|---|
|                                                           |        |              | TSS         | AUC   |               | Loss       | Gain | C   | S | D | V | Loss       | Gain | C   | S | D | V |
| <i>Acanthaeschna victoria</i> Martin, 1901                | E      | U            | 0.952       | 0.993 | 15129         | 40         | 176  | 0.5 |   | 1 | 0 | 57         | 170  | 3   |   | 5 | 3 |
| <i>Aciagrion fragile</i> (Tillyard, 1906)                 | NE     | C            | 0.821       | 0.954 | 109898        | 38         | 19   | 1.5 |   | 1 | 5 | 70         | 4    | 1.5 | Y | 1 | 2 |
| <i>Adversaeschna brevistyla</i> (Rambur, 1842)            | C      | C            | 0.72        | 0.811 | 891865        | 33         | 3    | 0.5 |   | 1 | 0 | 45         | 5    | 1.5 |   | 1 | 5 |
| <i>Aethriamanta circumsignata</i> Selys, 1897             | NE     | C            | 0.801       | 0.944 | 178981        | 27         | 90   | 1   |   | 1 | 5 | 44         | 41   | 1.5 |   | 1 | 5 |
| <i>Aethriamanta nymphaeae</i> Lieftinck, 1949             | NE     | U            | 0.883       | 0.975 | 38953         | 36         | 166  | 1   |   | 1 | 5 | 51         | 160  | 2.5 |   | 1 | 5 |
| <i>Agriocnemis argentea</i> Tillyard, 1906                | N      | C            | 0.81        | 0.951 | 287560        | 66         | 32   | 1.5 |   | 1 | 5 | 78         | 41   | 2   |   | 1 | 5 |
| <i>Agriocnemis dobsoni</i> Fraser, 1954                   | NE     | U            | 0.947       | 0.994 | 212           | 100        | 41   | 1   | Y | 4 | 1 | 100        | 8    | 2.5 | Y | 4 | 1 |
| <i>Agriocnemis kunjina</i> Watson, 1969                   | W      | U            | 0.942       | 0.985 | 5291          | 100        | 41   | 1   | Y | 5 | 1 | 100        | 41   | 1.5 | Y | 5 | 1 |
| <i>Agriocnemis pygmaea</i> (Rambur, 1842)                 | NE     | C            | 0.691       | 0.864 | 316948        | 36         | 140  | 1   |   | 1 | 5 | 52         | 35   | 1   |   | 1 | 5 |
| <i>Agriocnemis rubricauda</i> Tillyard, 1913              | NE     | C            | 0.794       | 0.956 | 62119         | 67         | 17   | 1.5 |   | 0 | 5 | 93         | 14   | 3   | Y | 3 | 1 |
| <i>Agrionoptera insignis allogenae</i> Tillyard, 1908     | NE     | C            | 0.883       | 0.997 | 99676         | 32         | 22   | 1   |   | 1 | 5 | 43         | 16   | 2.5 |   | 1 | 5 |
| <i>Agrionoptera longitudinalis biserialis</i> Selys, 1879 | NE     | C            | 0.93        | 0.968 | 5571          | 34         | 79   | 1   |   | 1 | 5 | 65         | 71   | 1.5 |   | 1 | 5 |
| <i>Anaciaeschna jaspidea</i> (Burmeister, 1839)           | N      | U            | 0.951       | 0.995 | 18778         | 27         | 125  | 1   |   | 1 | 5 | 50         | 104  | 3   |   | 1 | 5 |
| <i>Anax gibbosulus</i> Rambur, 1842                       | NE     | C            | 0.859       | 0.958 | 123661        | 21         | 149  | 1.5 |   | 1 | 5 | 38         | 53   | 2.5 |   | 1 | 5 |
| <i>Anax guttatus</i> (Burmeister, 1839)                   | N      | C            | 0.855       | 1.009 | 159657        | 12         | 136  | 1.5 |   | 1 | 5 | 24         | 128  | 3   |   | 1 | 5 |
| <i>Anax papuensis</i> (Burmeister, 1839)                  | C      | C            | 0.663       | 0.777 | 6137882       | 1          | 0    | 1   |   | 1 | 5 | 3          | 1    | 1   |   | 0 | 5 |
| <i>Antipodogomphus acolythus</i> (Martin, 1901)           | E      | C            | 0.846       | 0.969 | 246243        | 31         | 102  | 1   |   | 1 | 5 | 30         | 110  | 2   |   | 1 | 5 |
| <i>Antipodogomphus hodgkini</i> Watson, 1969              | W      | U            | 0.939       | 0.984 | 1711          | 100        | 34   | 2   |   | 4 | 3 | 100        | 55   | 2   |   | 3 | 3 |
| <i>Antipodogomphus proselythus</i> (Martin, 1901)         | NE     | U            | 0.952       | 0.988 | 13345         | 64         | 160  | 1.5 |   | 1 | 5 | 84         | 185  | 2.5 |   | 2 | 5 |
| <i>Antipodophlebia asthenes</i> (Tillyard, 1916)          | E      | U            | 0.91        | 0.983 | 34641         | 54         | 65   | 1.5 |   | 1 | 5 | 80         | 37   | 2.5 | Y | 5 | 1 |
| <i>Apocordulia macrops</i> Watson, 1980                   | S      | C            | 0.953       | 0.991 | 95762         | 40         | 51   | 1.5 |   | 1 | 5 | 60         | 46   | 2   |   | 1 | 5 |

| Species                                                  | Region | Record Group | Model Score |       | Current Range | RCP85_2055 |      |     |   |   | RCP85_2085 |      |      |     |   |   |   |
|----------------------------------------------------------|--------|--------------|-------------|-------|---------------|------------|------|-----|---|---|------------|------|------|-----|---|---|---|
|                                                          |        |              | TSS         | AUC   |               | Loss       | Gain | C   | S | D | V          | Loss | Gain | C   | S | D | V |
| <i>Archaeophya adamsi</i> Fraser, 1959                   | E      | U            | 0.926       | 0.97  | 4338          | 98         | 144  | 2.5 |   | 3 | 3          | 100  | 45   | 3   | Y | 5 | 1 |
| <i>Archaeophya magnifica</i> Theischinger & Watson, 1978 | NE     | U            | 0.945       | 0.987 | 7772          | 40         | 60   | 1   |   | 1 | 5          | 64   | 41   | 2   |   | 0 | 5 |
| <i>Archaeosynthemis leachii</i> (Selys, 1871)            | W      | C            | 0.899       | 0.979 | 25874         | 42         | 1    | 1   |   | 1 | 5          | 61   | 3    | 2   | Y | 1 | 2 |
| <i>Archaeosynthemis occidentalis</i> (Tillyard, 1910)    | W      | C            | 0.905       | 0.976 | 75771         | 16         | 4    | 1   |   | 0 | 5          | 27   | 7    | 2   | Y | 1 | 2 |
| <i>Archaeosynthemis orientalis</i> (Tillyard, 1910)      | S      | C            | 0.811       | 0.944 | 111703        | 42         | 22   | 0   |   | 1 | 0          | 65   | 24   | 1.5 |   | 1 | 5 |
| <i>Archaeosynthemis spiniger</i> (Tillyard, 1913)        | W      | U            | 0.949       | 0.986 | 24167         | 62         | 38   | 2   | Y | 0 | 2          | 86   | 14   | 2   | Y | 0 | 2 |
| <i>Archiargiolestes parvulus</i> (Watson, 1977)          | W      | U            | 0.943       | 0.99  | 3274          | 98         | 91   | 2.5 |   | 1 | 5          | 100  | 41   | 4.5 |   | 2 | 5 |
| <i>Archiargiolestes pusillissimus</i> Kennedy, 1925      | W      | U            | 0.953       | 0.992 | 20201         | 69         | 8    | 1.5 | Y | 1 | 2          | 72   | 16   | 1.5 |   | 1 | 5 |
| <i>Archiargiolestes pusillus</i> (Tillyard, 1908)        | W      | C            | 0.856       | 0.963 | 96223         | 31         | 8    | 0.5 |   | 1 | 0          | 42   | 10   | 1.5 | Y | 1 | 2 |
| <i>Archibasis mimetes</i> (Tillyard, 1913)               | NE     | C            | 0.938       | 0.986 | 15753         | 42         | 32   | 1   |   | 0 | 5          | 65   | 25   | 2   |   | 0 | 5 |
| <i>Archipetalia auriculata</i> Tillyard, 1917            | S      | U            | 0.921       | 0.979 | 6212          | 94         | 4    | 2   | Y | 3 | 1          | 100  | 0    | 3   | Y | 5 | 1 |
| <i>Argiocnemis rubescens</i> Selys, 1877                 | C      | C            | 0.701       | 0.869 | 590293        | 37         | 169  | 1   |   | 1 | 5          | 60   | 161  | 1.5 |   | 2 | 5 |
| <i>Armagomphus armiger</i> (Tillyard, 1913)              | W      | U            | 0.952       | 0.993 | 6818          | 100        | 0    | 2   | Y | 5 | 1          | 100  | 0    | 2   | Y | 5 | 1 |
| <i>Austroaeschna anacantha</i> Tillyard, 1908            | W      | C            | 0.861       | 0.966 | 19345         | 50         | 0    | 2   | Y | 0 | 2          | 69   | 0    | 2   | Y | 1 | 2 |
| <i>Austroaeschna atrata</i> Martin, 1901                 | S      | C            | 0.86        | 0.974 | 44034         | 44         | 50   | 1   |   | 1 | 5          | 62   | 55   | 2   |   | 5 | 3 |
| <i>Austroaeschna cooloola</i> Theischinger, 1991         | E      | U            | 0.951       | 0.998 | 479           | 100        | 84   | 3   |   | 2 | 5          | 100  | 73   | 4   |   | 5 | 3 |
| <i>Austroaeschna flavomaculata</i> Tillyard, 1916        | S      | C            | 0.949       | 0.991 | 13195         | 54         | 151  | 0.5 |   | 0 | 0          | 75   | 92   | 2   |   | 5 | 3 |
| <i>Austroaeschna hardyi</i> Tillyard 1907                | S      | C            | 0.71        | 0.894 | 28494         | 33         | 13   | 0.5 |   | 1 | 0          | 48   | 13   | 2   |   | 1 | 5 |
| <i>Austroaeschna inermis</i> Martin, 1901                | S      | C            | 0.808       | 0.958 | 136222        | 39         | 25   | 1   |   | 3 | 3          | 66   | 29   | 1.5 | Y | 3 | 1 |
| <i>Austroaeschna ingrid</i> Theischinger, 2008           | S      | U            | 0.923       | 0.968 | 907           | 100        | 0    | 2.5 | Y | 5 | 1          | 100  | 0    | 3   | Y | 5 | 1 |
| <i>Austroaeschna muelleri</i> Theischinger, 1982         | E      | U            | 0.926       | 0.972 | 200           | 100        | 89   | 4   | Y | 5 | 1          | 100  | 0    | 4   | Y | 5 | 1 |
| <i>Austroaeschna multipunctata</i> (Martin, 1901)        | S      | C            | 0.748       | 0.95  | 205204        | 38         | 33   | 0.5 |   | 1 | 0          | 62   | 30   | 0.5 |   | 4 | 7 |
| <i>Austroaeschna obscura</i> Theischinger, 1982          | S      | C            | 0.876       | 0.966 | 33824         | 84         | 110  | 2.5 |   | 4 | 3          | 94   | 122  | 2.5 |   | 4 | 3 |
| <i>Austroaeschna parvistigma</i> (Selys, 1883)           | S      | C            | 0.719       | 0.926 | 342452        | 41         | 0    | 0   |   | 0 | 0          | 61   | 0    | 1.5 | Y | 0 | 2 |
| <i>Austroaeschna pinheyi</i> Theischinger, 2001          | E      | C            | 0.951       | 0.997 | 1886          | 100        | 351  | 3   | Y | 5 | 1          | 100  | 187  | 3   |   | 5 | 3 |
| <i>Austroaeschna pulchra</i> Tillyard, 1909              | S      | C            | 0.682       | 0.905 | 271809        | 17         | 22   | 1   |   | 1 | 5          | 32   | 23   | 2   |   | 2 | 5 |
| <i>Austroaeschna sigma</i> Theischinger, 1982            | E      | C            | 0.803       | 0.949 | 118725        | 26         | 123  | 1   |   | 1 | 5          | 43   | 131  | 2.5 |   | 2 | 5 |
| <i>Austroaeschna speciosa</i> Sjöstedt, 1917             | NE     | U            | 0.951       | 0.996 | 6797          | 73         | 1    | 1   | Y | 0 | 2          | 93   | 0    | 1.5 | Y | 0 | 2 |
| <i>Austroaeschna subapicalis</i> Theischinger, 1982      | S      | C            | 0.787       | 0.972 | 59114         | 47         | 67   | 1   |   | 5 | 3          | 69   | 72   | 1.5 |   | 4 | 3 |
| <i>Austroaeschna tasmanica</i> Tillyard, 1916            | S      | C            | 0.863       | 0.976 | 18344         | 35         | 28   | 0   |   | 1 | 0          | 64   | 33   | 1.5 |   | 1 | 5 |
| <i>Austroaeschna unicornis</i> (Martin, 1901)            | S      | C            | 0.767       | 0.919 | 447473        | 28         | 5    | 0.5 |   | 1 | 0          | 43   | 4    | 1.5 |   | 0 | 5 |

| Species                                                             | Region | Record Group | Model Score |       | Current Range | RCP85_2055 |      |     |   |   | RCP85_2085 |      |      |     |   |   |   |
|---------------------------------------------------------------------|--------|--------------|-------------|-------|---------------|------------|------|-----|---|---|------------|------|------|-----|---|---|---|
|                                                                     |        |              | TSS         | AUC   |               | Loss       | Gain | C   | S | D | V          | Loss | Gain | C   | S | D | V |
| <i>Austroagrion cyane</i> (Selys, 1876)                             | W      | C            | 0.869       | 0.991 | 513930        | 39         | 77   | 0   |   | 1 | 0          | 43   | 85   | 0.5 |   | 1 | 0 |
| <i>Austroagrion exclamationis</i> Champion, 1915                    | NE     | C            | 0.722       | 0.947 | 204037        | 43         | 65   | 1.5 |   | 1 | 5          | 86   | 14   | 2   | Y | 1 | 2 |
| <i>Austroagrion pindrina</i> Watson, 1969                           | W      | C            | 0.867       | 0.969 | 143842        | 89         | 3    | 2   |   | 3 | 3          | 89   | 3    | 2   | Y | 2 | 2 |
| <i>Austroagrion watsoni</i> Lieftinck, 1982                         | C      | C            | 0.704       | 0.812 | 979482        | 42         | 15   | 0.5 |   | 1 | 0          | 51   | 15   | 1   |   | 0 | 5 |
| <i>Austroargiolestes alpinus</i> (Tillyard, 1913)                   | S      | U            | 0.947       | 0.994 | 473           | 8          | 67   | 2.5 |   | 1 | 5          | 100  | 0    | 2.5 | Y | 0 | 2 |
| <i>Austroargiolestes amabilis</i> (Förster, 1899)                   | E      | C            | 0.832       | 0.955 | 54161         | 52         | 48   | 1   |   | 1 | 5          | 90   | 23   | 2.5 | Y | 5 | 1 |
| <i>Austroargiolestes aureus</i> (Tillyard, 1906)                    | NE     | C            | 0.936       | 0.983 | 9857          | 46         | 15   | 1   |   | 1 | 5          | 66   | 2    | 2   | Y | 0 | 2 |
| <i>Austroargiolestes brookhousei</i> Theischinger & O'Farrell, 1986 | S      | U            | 0.92        | 0.961 | 2046          | 73         | 258  | 1.5 |   | 5 | 3          | 87   | 105  | 2.5 |   | 5 | 3 |
| <i>Austroargiolestes calcaris</i> (Fraser, 1958)                    | S      | C            | 0.826       | 0.96  | 84490         | 46         | 43   | 0.5 |   | 1 | 0          | 66   | 49   | 1.5 |   | 4 | 3 |
| <i>Austroargiolestes christine</i> Theischinger & O'Farrell, 1986   | E      | C            | 0.916       | 0.956 | 3897          | 47         | 335  | 2   |   | 1 | 5          | 90   | 18   | 2   | Y | 5 | 1 |
| <i>Austroargiolestes chrysoides</i> (Tillyard, 1913)                | E      | C            | 0.921       | 0.961 | 3915          | 87         | 254  | 2.5 |   | 5 | 3          | 98   | 224  | 3   |   | 4 | 3 |
| <i>Austroargiolestes icteromelas</i> (Selys, 1862)                  | E      | C            | 0.682       | 0.851 | 481535        | 25         | 15   | 1   |   | 1 | 5          | 38   | 17   | 1.5 |   | 2 | 5 |
| <i>Austroargiolestes isabellae</i> Theischinger & O'Farrell, 1986   | E      | C            | 0.944       | 0.984 | 15575         | 81         | 153  | 2.5 |   | 4 | 3          | 98   | 179  | 2.5 |   | 3 | 3 |
| <i>Austrocnemis maccullochi</i> (Tillyard, 1926)                    | N      | C            | 0.915       | 0.972 | 33091         | 39         | 516  | 2   |   | 1 | 5          | 66   | 142  | 3   |   | 2 | 5 |
| <i>Austrocnemis splendida</i> (Martin, 1901)                        | E      | C            | 0.745       | 0.938 | 421876        | 35         | 44   | 1   |   | 1 | 5          | 46   | 50   | 1.5 |   | 1 | 5 |
| <i>Austrocordulia leonardi</i> Theischinger, 1973                   | E      | U            | 0.933       | 0.98  | 707           | 100        | 152  | 3   | Y | 4 | 1          | 100  | 318  | 3   |   | 5 | 3 |
| <i>Austrocordulia refracta</i> Tillyard, 1909                       | E      | C            | 0.727       | 0.92  | 298017        | 32         | 32   | 1   |   | 1 | 5          | 46   | 36   | 1.5 |   | 1 | 5 |
| <i>Austroepigomphus gordonii</i> (Watson, 1962)                     | W      | C            | 0.813       | 0.957 | 520849        | 70         | 20   | 1.5 | Y | 4 | 1          | 74   | 26   | 2   | Y | 3 | 1 |
| <i>Austroepigomphus praeruptus</i> (Selys, 1857)                    | E      | C            | 0.771       | 0.963 | 370755        | 49         | 37   | 2   |   | 1 | 5          | 66   | 49   | 2   |   | 1 | 5 |
| <i>Austroepigomphus turneri</i> (Martin, 1901)                      | NE     | C            | 0.839       | 0.959 | 267132        | 44         | 66   | 1.5 |   | 1 | 5          | 79   | 24   | 1.5 | Y | 3 | 1 |
| <i>Austrogomphus amphiclitus</i> (Selys, 1873)                      | E      | C            | 0.706       | 0.927 | 247376        | 39         | 52   | 1   |   | 1 | 5          | 56   | 67   | 2   |   | 2 | 5 |
| <i>Austrogomphus arbustorum</i> Tillyard, 1906                      | NE     | U            | 0.952       | 0.998 | 8941          | 61         | 229  | 2.5 |   | 1 | 5          | 75   | 269  | 2.5 |   | 1 | 5 |
| <i>Austrogomphus australis</i> Dale, 1854                           | C      | C            | 0.696       | 0.94  | 814103        | 63         | 20   | 1.5 |   | 1 | 5          | 68   | 22   | 2.5 |   | 1 | 5 |
| <i>Austrogomphus bifurcatus</i> Tillyard, 1909                      | NE     | U            | 0.937       | 0.984 | 9998          | 40         | 21   | 1   |   | 1 | 5          | 68   | 13   | 2   | Y | 0 | 2 |
| <i>Austrogomphus collaris</i> Hagen, 1854                           | W      | C            | 0.855       | 0.972 | 52315         | 37         | 24   | 0.5 |   | 1 | 0          | 59   | 11   | 1.5 |   | 0 | 5 |
| <i>Austrogomphus cornutus</i> Watson, 1991                          | E      | C            | 0.722       | 0.92  | 690334        | 35         | 15   | 1   |   | 0 | 5          | 51   | 17   | 2   |   | 1 | 5 |
| <i>Austrogomphus divaricatus</i> Watson, 1991                       | NE     | C            | 0.917       | 0.986 | 19346         | 51         | 17   | 0.5 |   | 1 | 0          | 76   | 6    | 1.5 | Y | 1 | 2 |
| <i>Austrogomphus guerini</i> (Rambur, 1842)                         | S      | C            | 0.748       | 0.906 | 262475        | 47         | 6    | 1   |   | 0 | 5          | 69   | 8    | 1.5 | Y | 1 | 2 |
| <i>Austrogomphus mjobergi</i> Sjöstedt, 1917                        | N      | C            | 0.924       | 0.986 | 101458        | 61         | 724  | 2   |   | 1 | 5          | 85   | 538  | 2   |   | 4 | 3 |
| <i>Austrogomphus ochraceus</i> (Selys, 1869)                        | E      | C            | 0.709       | 0.889 | 325917        | 27         | 32   | 1   |   | 1 | 5          | 43   | 33   | 2   |   | 2 | 5 |
| <i>Austrogomphus prasinus</i> Tillyard, 1906                        | NE     | C            | 0.893       | 0.969 | 19830         | 64         | 15   | 0.5 |   | 0 | 0          | 89   | 17   | 1.5 | Y | 0 | 2 |

| Species                                             | Region | Record Group | Model Score |       | Current Range | RCP85_2055 |      |     |   |   |   | RCP85_2085 |      |     |   |   |   |
|-----------------------------------------------------|--------|--------------|-------------|-------|---------------|------------|------|-----|---|---|---|------------|------|-----|---|---|---|
|                                                     |        |              | TSS         | AUC   |               | Loss       | Gain | C   | S | D | V | Loss       | Gain | C   | S | D | V |
| <i>Austrogynacantha heterogena</i> Tillyard, 1908   | C      | C            | 0.747       | 0.891 | 1471593       | 29         | 63   | 1   |   | 1 | 5 | 34         | 57   | 1.5 |   | 1 | 5 |
| <i>Austrolestes aleison</i> Watson & Moulds, 1979   | W      | C            | 0.918       | 0.984 | 36915         | 27         | 40   | 0.5 |   | 1 | 0 | 70         | 45   | 1.5 |   | 1 | 5 |
| <i>Austrolestes analis</i> (Rambur, 1842)           | C      | C            | 0.729       | 0.847 | 958274        | 34         | 8    | 0   |   | 1 | 0 | 44         | 8    | 1.5 |   | 1 | 5 |
| <i>Austrolestes annulosus</i> (Selys, 1862)         | C      | C            | 0.736       | 0.942 | 804125        | 31         | 3    | 0   |   | 0 | 0 | 40         | 3    | 0.5 |   | 0 | 0 |
| <i>Austrolestes aridus</i> (Tillyard, 1908)         | C      | C            | 0.663       | 0.91  | 3139891       | 68         | 5    | 1   | Y | 2 | 2 | 72         | 7    | 1.5 | Y | 0 | 2 |
| <i>Austrolestes cingulatus</i> (Burmeister, 1839)   | S      | C            | 0.74        | 0.94  | 321128        | 38         | 3    | 0.5 | Y | 0 | 6 | 62         | 5    | 1.5 | Y | 1 | 2 |
| <i>Austrolestes insularis</i> Tillyard, 1913        | N      | C            | 0.793       | 0.93  | 225815        | 41         | 36   | 1.5 |   | 1 | 5 | 78         | 17   | 2   | Y | 1 | 2 |
| <i>Austrolestes io</i> (Selys, 1862)                | C      | C            | 0.85        | 0.977 | 463180        | 25         | 26   | 0   |   | 1 | 0 | 34         | 25   | 0.5 |   | 1 | 0 |
| <i>Austrolestes leda</i> (Selys, 1862)              | C      | C            | 0.695       | 0.812 | 958761        | 38         | 12   | 0.5 |   | 1 | 0 | 48         | 12   | 2   |   | 1 | 5 |
| <i>Austrolestes minjerriba</i> Watson, 1979         | E      | C            | 0.926       | 0.969 | 4832          | 95         | 56   | 1   |   | 4 | 3 | 100        | 39   | 2.5 | Y | 4 | 1 |
| <i>Austrolestes psyche</i> (Hagen, 1862)            | S      | C            | 0.748       | 0.894 | 485223        | 34         | 2    | 0.5 |   | 0 | 0 | 52         | 3    | 2   | Y | 0 | 2 |
| <i>Austropetalia patricia</i> (Tillyard, 1910)      | S      | U            | 0.924       | 0.97  | 585           | 100        | 533  | 2.5 |   | 5 | 3 | 100        | 300  | 3   |   | 4 | 3 |
| <i>Austropetalia tonyana</i> Theischinger, 1995     | S      | U            | 0.862       | 0.964 | 54273         | 55         | 36   | 1   |   | 0 | 5 | 69         | 26   | 2   | Y | 4 | 1 |
| <i>Austrophlebia costalis</i> (Tillyard, 1907)      | E      | C            | 0.824       | 0.964 | 73920         | 29         | 88   | 1.5 |   | 1 | 5 | 57         | 109  | 2   |   | 2 | 5 |
| <i>Austrophlebia subcostalis</i> Theischinger, 1996 | NE     | U            | 0.93        | 0.971 | 2449          | 80         | 31   | 1   |   | 0 | 5 | 100        | 0    | 2   | Y | 5 | 1 |
| <i>Austrophya mystica</i> Tillyard, 1909            | NE     | U            | 0.907       | 0.983 | 14427         | 73         | 42   | 1   |   | 4 | 3 | 82         | 7    | 1.5 | Y | 1 | 2 |
| <i>Austrosticta fieldi</i> Tillyard, 1908           | N      | U            | 0.952       | 0.993 | 60927         | 71         | 80   | 2   |   | 3 | 3 | 94         | 56   | 2   |   | 5 | 3 |
| <i>Austrosticta frater</i> Theischinger, 1997       | N      | U            | 0.952       | 0.995 | 23119         | 64         | 284  | 2   |   | 1 | 5 | 98         | 186  | 3   |   | 3 | 3 |
| <i>Austrosynthemis cyanitincta</i> (Tillyard, 1908) | W      | C            | 0.897       | 0.978 | 26641         | 53         | 0    | 2   | Y | 2 | 2 | 76         | 1    | 2   | Y | 1 | 2 |
| <i>Austrothemis nigrescens</i> (Martin, 1901)       | C      | C            | 0.802       | 0.955 | 335342        | 24         | 60   | 0   |   | 1 | 0 | 27         | 66   | 1   |   | 1 | 5 |
| <i>Brachydiplax denticauda</i> (Brauer, 1867)       | NE     | C            | 0.778       | 0.951 | 124617        | 26         | 155  | 1   |   | 1 | 5 | 49         | 47   | 2.5 |   | 1 | 5 |
| <i>Brachydiplax duivenbodei</i> (Brauer, 1866)      | NE     | U            | 0.951       | 0.995 | 8583          | 19         | 178  | 1.5 |   | 1 | 5 | 24         | 318  | 3   |   | 2 | 5 |
| <i>Caliagrion billinghursti</i> (Martin, 1901)      | S      | C            | 0.892       | 0.977 | 77444         | 63         | 98   | 2   |   | 1 | 5 | 76         | 146  | 2.5 |   | 2 | 5 |
| <i>Camacinia othello</i> Tillyard, 1908             | NE     | U            | 0.93        | 0.976 | 2993          | 21         | 301  | 1   |   | 1 | 5 | 47         | 555  | 3   |   | 1 | 5 |
| <i>Ceriagrion aeruginosum</i> (Brauer, 1869)        | NE     | C            | 0.719       | 0.964 | 345650        | 14         | 56   | 1   |   | 1 | 5 | 35         | 21   | 1.5 |   | 1 | 5 |
| <i>Chorismagrion risi</i> Morton, 1914              | NE     | C            | 0.922       | 0.957 | 6335          | 54         | 74   | 1   |   | 2 | 5 | 81         | 39   | 2   |   | 1 | 5 |
| <i>Choristhemis flavoterminata</i> (Martin, 1901)   | E      | C            | 0.715       | 0.917 | 329891        | 30         | 48   | 0.5 |   | 1 | 0 | 43         | 57   | 1.5 |   | 2 | 5 |
| <i>Coenagrion lyelli</i> (Tillyard, 1913)           | S      | C            | 0.818       | 0.962 | 144651        | 74         | 1    | 0.5 | Y | 0 | 6 | 87         | 1    | 1   | Y | 0 | 2 |
| <i>Cordulephya montana</i> Tillyard, 1911           | S      | U            | 0.936       | 0.979 | 30014         | 78         | 55   | 1   | Y | 3 | 1 | 90         | 43   | 2   | Y | 5 | 1 |
| <i>Cordulephya pygmaea</i> Selys, 1870              | E      | C            | 0.698       | 0.918 | 252285        | 30         | 33   | 1   |   | 0 | 5 | 47         | 34   | 2   |   | 1 | 5 |
| <i>Crocothemis nigrifrons</i> (Kirby, 1894)         | C      | C            | 0.732       | 0.881 | 983366        | 25         | 92   | 1   |   | 1 | 5 | 24         | 89   | 1.5 |   | 1 | 5 |

| Species                                              | Region | Record Group | Model Score |       | Current Range | RCP85_2055 |      |     |   |   | RCP85_2085 |      |      |     |   |   |   |
|------------------------------------------------------|--------|--------------|-------------|-------|---------------|------------|------|-----|---|---|------------|------|------|-----|---|---|---|
|                                                      |        |              | TSS         | AUC   |               | Loss       | Gain | C   | S | D | V          | Loss | Gain | C   | S | D | V |
| <i>Dendroaeschna conspersa</i> (Tillyard, 1907)      | E      | C            | 0.828       | 0.987 | 54787         | 44         | 80   | 1.5 |   | 1 | 5          | 66   | 96   | 2.5 |   | 2 | 5 |
| <i>Diphlebia coerulescens</i> Tillyard, 1913         | E      | C            | 0.878       | 0.972 | 27169         | 46         | 93   | 1.5 |   | 1 | 5          | 82   | 109  | 2.5 |   | 3 | 3 |
| <i>Diphlebia euphoeoides</i> Tillyard, 1907          | NE     | C            | 0.875       | 0.964 | 20331         | 54         | 9    | 0.5 |   | 1 | 0          | 77   | 4    | 1.5 | Y | 1 | 2 |
| <i>Diphlebia hybridoides</i> Tillyard, 1912          | NE     | U            | 0.931       | 0.972 | 4869          | 70         | 26   | 1   |   | 1 | 5          | 84   | 11   | 2   | Y | 1 | 2 |
| <i>Diphlebia lestoides</i> (Selys, 1853)             | S      | C            | 0.71        | 0.909 | 252136        | 31         | 40   | 1   |   | 1 | 5          | 52   | 44   | 2   |   | 2 | 5 |
| <i>Diphlebia nymphoides</i> Tillyard, 1912           | S      | C            | 0.714       | 0.914 | 288748        | 34         | 34   | 1   |   | 0 | 5          | 48   | 32   | 2   |   | 1 | 5 |
| <i>Diplacodes bipunctata</i> (Brauer, 1865)          | C      | C            | 0.649       | 0.704 | 6134082       | 1          | 1    | 1   |   | 1 | 5          | 3    | 1    | 1   |   | 1 | 5 |
| <i>Diplacodes haematodes</i> (Burmeister, 1839)      | C      | C            | 0.748       | 0.795 | 5041586       | 3          | 10   | 1   |   | 1 | 5          | 4    | 14   | 1.5 |   | 1 | 5 |
| <i>Diplacodes melanopsis</i> (Martin, 1901)          | E      | C            | 0.723       | 0.934 | 280866        | 31         | 36   | 0.5 |   | 1 | 0          | 48   | 40   | 2   |   | 1 | 5 |
| <i>Diplacodes nebulosa</i> (Fabricius, 1793)         | N      | C            | 0.811       | 0.946 | 96726         | 16         | 125  | 1.5 |   | 1 | 5          | 29   | 41   | 2   |   | 1 | 5 |
| <i>Diplacodes trivialis</i> (Rambur, 1842)           | NE     | C            | 0.726       | 0.931 | 189245        | 21         | 186  | 1   |   | 1 | 5          | 59   | 38   | 2.5 |   | 1 | 5 |
| <i>Dromaeschna forcipata</i> (Tillyard, 1907)        | NE     | C            | 0.907       | 0.974 | 15888         | 33         | 16   | 0.5 |   | 0 | 0          | 60   | 4    | 1.5 | Y | 1 | 2 |
| <i>Dromaeschna weiskei</i> (Förster, 1908)           | NE     | C            | 0.919       | 0.985 | 10057         | 41         | 9    | 1   |   | 0 | 5          | 74   | 1    | 2   | Y | 0 | 2 |
| <i>Episynlestes albicauda</i> (Tillyard, 1913)       | E      | C            | 0.819       | 0.968 | 80800         | 79         | 38   | 1.5 |   | 4 | 3          | 95   | 26   | 2.5 | Y | 4 | 1 |
| <i>Episynlestes cristatus</i> Watson & Moulds, 1977  | NE     | U            | 0.92        | 0.965 | 1402          | 92         | 71   | 1   |   | 1 | 5          | 100  | 1    | 2   | Y | 3 | 1 |
| <i>Eurysticta coolawanyah</i> Watson, 1969           | W      | C            | 0.865       | 0.969 | 298177        | 83         | 33   | 2   | Y | 5 | 1          | 84   | 40   | 2   | Y | 4 | 1 |
| <i>Eusynthemis aurolineata</i> (Tillyard, 1913)      | E      | C            | 0.809       | 0.944 | 78530         | 34         | 146  | 1.5 |   | 1 | 5          | 64   | 116  | 2.5 |   | 4 | 3 |
| <i>Eusynthemis brevistyla</i> (Selys, 1871)          | S      | C            | 0.764       | 0.961 | 223119        | 35         | 32   | 1   |   | 1 | 5          | 53   | 32   | 1.5 |   | 2 | 5 |
| <i>Eusynthemis guttata</i> (Selys, 1871)             | S      | C            | 0.785       | 0.952 | 116988        | 46         | 51   | 0.5 |   | 2 | 0          | 68   | 49   | 1.5 |   | 4 | 3 |
| <i>Eusynthemis nigra</i> (Tillyard, 1906)            | E      | C            | 0.79        | 0.947 | 107382        | 22         | 86   | 0   |   | 1 | 0          | 41   | 109  | 1.5 |   | 1 | 5 |
| <i>Eusynthemis rentziana</i> Theischinger, 1998      | E      | U            | 0.896       | 0.977 | 32567         | 74         | 34   | 1.5 | Y | 4 | 1          | 94   | 16   | 2.5 | Y | 5 | 1 |
| <i>Eusynthemis tillyardi</i> Theischinger, 1995      | S      | C            | 0.814       | 0.949 | 102556        | 52         | 29   | 1.5 |   | 1 | 5          | 62   | 26   | 2   |   | 1 | 5 |
| <i>Eusynthemis ursula</i> Theischinger, 1998         | S      | U            | 0.946       | 0.993 | 223           | 77         | 70   | 2   |   | 1 | 5          | 100  | 0    | 3   | Y | 5 | 1 |
| <i>Eusynthemis virgula</i> (Selys, 1874)             | S      | C            | 0.746       | 0.978 | 211123        | 40         | 27   | 1   |   | 1 | 5          | 63   | 22   | 2   |   | 4 | 3 |
| <i>Griseargiolestes albescens</i> (Tillyard, 1913)   | E      | C            | 0.954       | 0.995 | 7875          | 95         | 43   | 2   |   | 5 | 3          | 100  | 38   | 3   | Y | 4 | 1 |
| <i>Griseargiolestes bucki</i> Theischinger, 1998     | E      | U            | 0.924       | 0.967 | 2744          | 88         | 290  | 1.5 | Y | 3 | 1          | 93   | 131  | 2.5 |   | 5 | 3 |
| <i>Griseargiolestes eboracus</i> (Tillyard, 1913)    | E      | C            | 0.844       | 0.965 | 100286        | 53         | 46   | 1   |   | 1 | 5          | 83   | 36   | 1.5 | Y | 5 | 1 |
| <i>Griseargiolestes fontanus</i> (Tillyard, 1913)    | E      | U            | 0.952       | 0.989 | 9302          | 97         | 9    | 2   | Y | 4 | 1          | 100  | 4    | 2.5 | Y | 5 | 1 |
| <i>Griseargiolestes griseus</i> (Hagen, 1862)        | S      | C            | 0.849       | 1     | 126301        | 46         | 35   | 1   |   | 1 | 5          | 60   | 33   | 2   |   | 2 | 5 |
| <i>Griseargiolestes intermedius</i> (Tillyard, 1913) | S      | C            | 0.911       | 0.97  | 28031         | 37         | 56   | 1   |   | 0 | 5          | 56   | 37   | 2   |   | 5 | 3 |
| <i>Griseargiolestes metallicus</i> (Sjöstedt, 1917)  | NE     | U            | 0.922       | 0.966 | 845           | 100        | 9    | 2   | Y | 3 | 1          | 100  | 0    | 2   | Y | 5 | 1 |

| Species                                                  | Region | Record Group | Model Score |       | Current Range | RCP85_2055 |      |     |   |   |   | RCP85_2085 |      |     |   |   |   |
|----------------------------------------------------------|--------|--------------|-------------|-------|---------------|------------|------|-----|---|---|---|------------|------|-----|---|---|---|
|                                                          |        |              | TSS         | AUC   |               | Loss       | Gain | C   | S | D | V | Loss       | Gain | C   | S | D | V |
| <i>Gynacantha dobsoni</i> Fraser, 1951                   | N      | C            | 0.804       | 0.946 | 88543         | 38         | 282  | 1.5 |   | 1 | 5 | 61         | 71   | 1.5 |   | 1 | 5 |
| <i>Gynacantha mocsaryi</i> Förster, 1898                 | NE     | C            | 0.935       | 0.988 | 13843         | 22         | 53   | 1   |   | 1 | 5 | 51         | 36   | 3.5 |   | 0 | 5 |
| <i>Gynacantha nourlangie</i> Theischinger & Watson, 1991 | N      | C            | 0.78        | 0.97  | 166293        | 41         | 120  | 2   |   | 1 | 5 | 91         | 28   | 2   | Y | 3 | 1 |
| <i>Gynacantha rosenbergi</i> Kaup, 1867                  | NE     | C            | 0.927       | 0.989 | 12310         | 34         | 43   | 1   |   | 1 | 5 | 60         | 45   | 1.5 |   | 1 | 5 |
| <i>Hemicordulia australiae</i> (Rambur, 1842)            | C      | C            | 0.692       | 0.856 | 557063        | 32         | 26   | 1   |   | 1 | 5 | 37         | 29   | 1.5 |   | 1 | 5 |
| <i>Hemicordulia continentalis</i> Martin, 1901           | E      | C            | 0.838       | 0.966 | 64490         | 39         | 28   | 0.5 |   | 1 | 0 | 54         | 22   | 2.5 |   | 1 | 5 |
| <i>Hemicordulia intermedia</i> (Selys, 1871)             | C      | C            | 0.734       | 0.892 | 861310        | 38         | 66   | 1   |   | 1 | 5 | 65         | 55   | 1.5 |   | 1 | 5 |
| <i>Hemicordulia koomina</i> Watson, 1969                 | W      | U            | 0.952       | 0.986 | 119416        | 97         | 3    | 2   | Y | 4 | 1 | 99         | 5    | 2   | Y | 4 | 1 |
| <i>Hemicordulia superba</i> Tillyardi, 1911              | E      | C            | 0.947       | 0.991 | 101316        | 50         | 97   | 2   |   | 1 | 5 | 76         | 119  | 3   |   | 1 | 5 |
| <i>Hemicordulia tau</i> (Selys, 1871)                    | C      | C            | 0.765       | 0.935 | 1768259       | 30         | 66   | 1   |   | 1 | 5 | 40         | 115  | 1.5 |   | 1 | 5 |
| <i>Hemigomphus comitatus</i> (Tillyard, 1909)            | NE     | C            | 0.901       | 0.969 | 38306         | 45         | 31   | 0.5 |   | 0 | 0 | 78         | 14   | 2   | Y | 5 | 1 |
| <i>Hemigomphus cooloola</i> Watson, 1991                 | E      | U            | 0.952       | 0.978 | 125           | 100        | 0    | 2.5 | Y | 5 | 1 | 100        | 0    | 4   | Y | 5 | 1 |
| <i>Hemigomphus gouldii</i> (Selys, 1854)                 | E      | C            | 0.736       | 0.902 | 304650        | 26         | 17   | 1   |   | 1 | 5 | 44         | 18   | 2   |   | 2 | 5 |
| <i>Hemigomphus heteroclytus</i> Selys, 1854              | E      | C            | 0.702       | 0.905 | 188130        | 37         | 39   | 1.5 |   | 1 | 5 | 58         | 52   | 2   |   | 1 | 5 |
| <i>Hemigomphus magela</i> Watson, 1991                   | N      | U            | 0.935       | 0.978 | 2316          | 97         | 52   | 1.5 | Y | 3 | 1 | 100        | 66   | 2   | Y | 2 | 2 |
| <i>Hemigomphus theischingeri</i> Watson, 1991            | NE     | U            | 0.938       | 0.983 | 2147          | 87         | 66   | 1.5 |   | 1 | 5 | 97         | 32   | 2   | Y | 0 | 2 |
| <i>Hemiphlebia mirabilis</i> Selys, 1869                 | S      | C            | 0.93        | 0.99  | 39071         | 97         | 50   | 1   |   | 1 | 5 | 100        | 54   | 1   |   | 1 | 5 |
| <i>Hesperocordulia berthoudi</i> Tillyard, 1911          | W      | C            | 0.91        | 0.979 | 9110          | 86         | 1    | 2   | Y | 2 | 2 | 100        | 0    | 2   | Y | 5 | 1 |
| <i>Hydrobasileus brevistylus</i> (Brauer, 1865)          | NE     | C            | 0.79        | 0.956 | 105908        | 46         | 129  | 1   |   | 1 | 5 | 66         | 36   | 1.5 |   | 1 | 5 |
| <i>Ictinogomphus australis</i> (Selys, 1873)             | NE     | C            | 0.711       | 0.921 | 523418        | 22         | 183  | 1   |   | 1 | 5 | 23         | 185  | 1.5 |   | 1 | 5 |
| <i>Ictinogomphus dobsoni</i> (Watson, 1969)              | W      | C            | 0.943       | 0.986 | 137401        | 88         | 13   | 1.5 | Y | 4 | 1 | 91         | 14   | 2   | Y | 3 | 1 |
| <i>Indolestes alleni</i> (Tillyard, 1913)                | N      | U            | 0.952       | 0.987 | 13344         | 27         | 60   | 1.5 |   | 1 | 5 | 39         | 73   | 3   |   | 1 | 5 |
| <i>Indolestes obiri</i> Watson, 1979                     | N      | U            | 0.934       | 0.979 | 2766          | 100        | 0    | 1   | Y | 5 | 1 | 100        | 0    | 2   | Y | 5 | 1 |
| <i>Indolestes tenuissimus</i> (Tillyard, 1906)           | NE     | C            | 0.942       | 0.988 | 14448         | 51         | 34   | 1.5 |   | 1 | 5 | 72         | 33   | 3   |   | 0 | 5 |
| <i>Ischnura aurora</i> (Brauer, 1865)                    | C      | C            | 0.642       | 0.874 | 5582244       | 8          | 9    | 1   |   | 0 | 5 | 8          | 10   | 1   |   | 1 | 5 |
| <i>Ischnura heterosticta</i> (Burmeister, 1839)          | C      | C            | 0.739       | 0.957 | 2321650       | 25         | 56   | 1   |   | 1 | 5 | 34         | 75   | 1   |   | 1 | 5 |
| <i>Ischnura pruinescens</i> (Tillyard, 1906)             | NE     | C            | 0.767       | 0.97  | 126613        | 57         | 82   | 1   |   | 1 | 5 | 79         | 13   | 1.5 | Y | 1 | 2 |
| <i>Labidiosticta vallisii</i> (Fraser, 1955)             | E      | C            | 0.892       | 0.982 | 72550         | 28         | 64   | 1   |   | 1 | 5 | 44         | 93   | 1.5 |   | 2 | 5 |
| <i>Lathrecista asiatica festa</i> (Selys, 1879)          | NE     | C            | 0.815       | 0.975 | 84211         | 34         | 121  | 1.5 |   | 1 | 5 | 65         | 24   | 3   |   | 1 | 5 |
| <i>Lathrocordulia metallica</i> Tillyard, 1911           | W      | C            | 0.936       | 0.987 | 11524         | 97         | 0    | 2   | Y | 2 | 2 | 100        | 0    | 2   | Y | 5 | 1 |
| <i>Lestes concinnus</i> Hagen, 1862                      | N      | C            | 0.742       | 0.909 | 309099        | 35         | 172  | 1.5 |   | 1 | 5 | 74         | 51   | 2   |   | 1 | 5 |

| Species                                                     | Region | Record Group | Model Score |       | Current Range | RCP85_2055 |      |     |   |   |   | RCP85_2085 |      |     |   |   |   |
|-------------------------------------------------------------|--------|--------------|-------------|-------|---------------|------------|------|-----|---|---|---|------------|------|-----|---|---|---|
|                                                             |        |              | TSS         | AUC   |               | Loss       | Gain | C   | S | D | V | Loss       | Gain | C   | S | D | V |
| <i>Lestoidea brevicauda</i> Theischinger, 1996              | NE     | U            | 0.916       | 0.961 | 734           | 80         | 72   | 2   |   | 1 | 5 | 90         | 101  | 3   |   | 1 | 5 |
| <i>Lestoidea conjuncta</i> Tillyard, 1913                   | NE     | C            | 0.922       | 0.986 | 10835         | 49         | 28   | 1   |   | 1 | 5 | 73         | 13   | 2   | Y | 0 | 2 |
| <i>Lestoidea lewisiana</i> Theischinger, 1996               | NE     | U            | 0.944       | 0.991 | 354           | 100        | 0    | 3.5 | Y | 5 | 1 | 100        | 0    | 4   | Y | 5 | 1 |
| <i>Macrodiplax cora</i> (Kaup, 1867)                        | C      | C            | 0.737       | 0.962 | 260085        | 41         | 321  | 1.5 |   | 1 | 5 | 73         | 189  | 1.5 |   | 2 | 5 |
| <i>Macromia tillyardi</i> Martin, 1906                      | NE     | C            | 0.909       | 0.982 | 104862        | 63         | 82   | 1.5 |   | 1 | 5 | 77         | 75   | 1.5 |   | 1 | 5 |
| <i>Micromidia atrifrons</i> (McLachlan, 1883)               | E      | C            | 0.848       | 0.967 | 90250         | 29         | 39   | 0.5 |   | 1 | 0 | 52         | 45   | 1.5 |   | 1 | 5 |
| <i>Micromidia convergens</i> Theischinger & Watson, 1978    | E      | U            | 0.944       | 0.991 | 783           | 100        | 503  | 2.5 |   | 4 | 3 | 99         | 369  | 3   |   | 3 | 3 |
| <i>Miniargiolestes minimus</i> (Tillyard, 1908)             | W      | C            | 0.889       | 0.975 | 26576         | 45         | 6    | 1   | Y | 1 | 2 | 58         | 1    | 2   | Y | 1 | 2 |
| <i>Nannodiplax rubra</i> Brauer, 1868                       | C      | C            | 0.718       | 0.921 | 420494        | 15         | 37   | 1   |   | 1 | 5 | 39         | 12   | 1.5 |   | 1 | 5 |
| <i>Nannophlebia eludens</i> Tillyard, 1908                  | NE     | C            | 0.81        | 0.942 | 116902        | 18         | 40   | 1   |   | 1 | 5 | 42         | 12   | 1.5 |   | 1 | 5 |
| <i>Nannophlebia injibandi</i> Watson, 1969                  | N      | C            | 0.954       | 0.993 | 314512        | 53         | 140  | 2   |   | 3 | 3 | 94         | 105  | 2   |   | 4 | 3 |
| <i>Nannophlebia mudginberri</i> Watson & Theischinger, 1991 | N      | U            | 0.953       | 0.99  | 19412         | 67         | 108  | 2   |   | 1 | 5 | 85         | 37   | 3   |   | 1 | 5 |
| <i>Nannophlebia risi</i> Tillyard, 1913                     | E      | C            | 0.699       | 0.918 | 202605        | 27         | 41   | 1   |   | 1 | 5 | 45         | 44   | 2   |   | 1 | 5 |
| <i>Nannophya australis</i> Brauer, 1865                     | E      | C            | 0.814       | 0.983 | 226849        | 72         | 47   | 1   | Y | 1 | 2 | 86         | 43   | 1   | Y | 5 | 1 |
| <i>Nannophya dalei</i> (Tillyard, 1908)                     | S      | C            | 0.816       | 0.974 | 194220        | 47         | 10   | 0   |   | 1 | 0 | 60         | 8    | 1   | Y | 1 | 2 |
| <i>Nannophya occidentalis</i> (Tillyard, 1908)              | W      | U            | 0.953       | 0.99  | 19107         | 42         | 40   | 0.5 |   | 1 | 0 | 52         | 50   | 1.5 |   | 1 | 5 |
| <i>Neosticta canescens</i> Tillyard, 1913                   | E      | C            | 0.838       | 0.959 | 91359         | 19         | 104  | 1   |   | 1 | 5 | 35         | 129  | 2   |   | 2 | 5 |
| <i>Neosticta fraseri</i> Watson, 1991                       | NE     | C            | 0.936       | 0.989 | 9483          | 29         | 49   | 1   |   | 2 | 5 | 52         | 17   | 1.5 |   | 1 | 5 |
| <i>Neurothemis oligoneura</i> Brauer, 1867                  | NE     | U            | 0.952       | 0.994 | 8363          | 66         | 29   | 2   |   | 4 | 3 | 82         | 39   | 3   |   | 3 | 3 |
| <i>Neurothemis stigmatizans</i> (Fabricius, 1775)           | N      | C            | 0.761       | 0.956 | 277758        | 5          | 140  | 1.5 |   | 1 | 5 | 10         | 150  | 2   |   | 1 | 5 |
| <i>Nososticta baroalba</i> Watson & Theischinger, 1984      | N      | C            | 0.953       | 0.994 | 47516         | 42         | 58   | 1   |   | 1 | 5 | 44         | 16   | 1.5 | Y | 1 | 2 |
| <i>Nososticta coelestina</i> (Tillyard, 1906)               | N      | C            | 0.827       | 0.95  | 83749         | 46         | 24   | 1.5 |   | 1 | 5 | 59         | 15   | 1.5 |   | 1 | 5 |
| <i>Nososticta fraterna</i> (Lieftinck, 1933)                | N      | C            | 0.819       | 0.984 | 92210         | 76         | 65   | 2   |   | 4 | 3 | 100        | 18   | 2   | Y | 5 | 1 |
| <i>Nososticta kalumburu</i> Watson & Theischinger, 1984     | N      | U            | 0.951       | 0.992 | 17434         | 83         | 5    | 2   | Y | 4 | 1 | 90         | 4    | 2   | Y | 3 | 1 |
| <i>Nososticta koolpinyah</i> Watson & Theischinger, 1984    | N      | U            | 0.948       | 0.991 | 1605          | 100        | 28   | 2   | Y | 4 | 1 | 100        | 0    | 3   | Y | 5 | 1 |
| <i>Nososticta koongarra</i> Watson & Theischinger, 1984     | N      | U            | 0.929       | 0.974 | 1028          | 100        | 176  | 1   |   | 3 | 3 | 100        | 50   | 1   | Y | 3 | 1 |
| <i>Nososticta liveringa</i> Watson & Theischinger, 1984     | N      | C            | 0.924       | 0.972 | 97573         | 70         | 107  | 2   |   | 4 | 3 | 92         | 18   | 2   | Y | 5 | 1 |
| <i>Nososticta pilbara</i> Watson, 1969                      | N      | U            | 0.939       | 0.985 | 199           | 100        | 0    | 2.5 | Y | 5 | 1 | 100        | 0    | 2.5 | Y | 5 | 1 |
| <i>Nososticta solida</i> (Hagen, 1860)                      | E      | C            | 0.728       | 0.888 | 599998        | 34         | 32   | 1   |   | 1 | 5 | 49         | 38   | 1.5 |   | 1 | 5 |
| <i>Nososticta solitaria</i> (Tillyard, 1906)                | E      | C            | 0.783       | 0.94  | 149277        | 18         | 39   | 1.5 |   | 1 | 5 | 27         | 45   | 1.5 |   | 1 | 5 |
| <i>Nososticta taracumbi</i> Watson & Theischinger, 1984     | N      | U            | 0.937       | 0.982 | 1392          | 98         | 31   | 1.5 | Y | 4 | 1 | 98         | 2    | 3   | Y | 2 | 2 |

| Species                                                 | Region | Record Group | Model Score |       | Current Range | RCP85_2055 |      |     |   |   | RCP85_2085 |      |      |     |   |   |   |
|---------------------------------------------------------|--------|--------------|-------------|-------|---------------|------------|------|-----|---|---|------------|------|------|-----|---|---|---|
|                                                         |        |              | TSS         | AUC   |               | Loss       | Gain | C   | S | D | V          | Loss | Gain | C   | S | D | V |
| <i>Notoaeschna geminata</i> Theischinger, 1982          | E      | C            | 0.84        | 0.955 | 51743         | 20         | 105  | 1.5 |   | 1 | 5          | 41   | 87   | 2.5 |   | 2 | 5 |
| <i>Notoaeschna sagittata</i> (Martin, 1901)             | S      | C            | 0.874       | 1.011 | 85029         | 54         | 34   | 1.5 |   | 1 | 5          | 75   | 25   | 2   | Y | 4 | 1 |
| <i>Notolibellula bicolor</i> Theischinger & Watson 1977 | N      | U            | 0.951       | 0.997 | 10868         | 88         | 182  | 2   |   | 1 | 5          | 94   | 208  | 2   |   | 3 | 3 |
| <i>Oristicta filicicola</i> Tillyard, 1913              | NE     | C            | 0.944       | 0.985 | 12059         | 35         | 52   | 0.5 |   | 1 | 0          | 61   | 41   | 1.5 |   | 1 | 5 |
| <i>Orthetrum boumiera</i> Watson & Arthington, 1978     | E      | U            | 0.941       | 0.985 | 906           | 84         | 84   | 2   |   | 1 | 5          | 100  | 81   | 4   |   | 5 | 3 |
| <i>Orthetrum caledonicum</i> (Brauer, 1865)             | C      | C            | 0.687       | 0.745 | 6065482       | 1          | 1    | 1   |   | 0 | 5          | 3    | 1    | 1.5 |   | 0 | 5 |
| <i>Orthetrum migratum</i> Lieftinck, 1951               | C      | C            | 0.711       | 0.926 | 616573        | 35         | 67   | 1.5 |   | 1 | 5          | 70   | 51   | 2   |   | 2 | 5 |
| <i>Orthetrum sabina</i> (Drury, 1770)                   | C      | C            | 0.745       | 0.948 | 204114        | 10         | 157  | 1   |   | 1 | 5          | 25   | 61   | 2.5 |   | 1 | 5 |
| <i>Orthetrum serapia</i> Watson, 1984                   | NE     | C            | 0.882       | 0.974 | 44700         | 35         | 89   | 1.5 |   | 1 | 5          | 69   | 97   | 3   |   | 1 | 5 |
| <i>Orthetrum villosovittatum</i> (Brauer, 1865)         | C      | C            | 0.767       | 0.899 | 465265        | 39         | 26   | 1   |   | 1 | 5          | 55   | 24   | 1.5 |   | 1 | 5 |
| <i>Pantala flavescens</i> (Fabricius, 1798)             | C      | C            | 0.677       | 0.859 | 2833165       | 6          | 38   | 1.5 |   | 1 | 5          | 7    | 64   | 2   |   | 1 | 5 |
| <i>Parasythemis regina</i> (Selys, 1874)                | E      | C            | 0.746       | 0.93  | 539172        | 38         | 29   | 1   |   | 1 | 5          | 53   | 33   | 2   |   | 1 | 5 |
| <i>Pentathemis membranulata</i> Karsch, 1890            | N      | C            | 0.894       | 0.982 | 90251         | 14         | 331  | 1.5 |   | 1 | 5          | 34   | 202  | 3   |   | 1 | 5 |
| <i>Petalura gigantea</i> Leach, 1815                    | S      | C            | 0.891       | 0.971 | 22059         | 80         | 79   | 1.5 |   | 3 | 3          | 97   | 45   | 2.5 |   | 5 | 3 |
| <i>Petalura hesperia</i> Watson, 1958                   | W      | U            | 0.952       | 0.994 | 9622          | 26         | 18   | 2.5 |   | 1 | 5          | 44   | 16   | 3   |   | 1 | 5 |
| <i>Petalura ingentissima</i> Tillyard, 1908             | NE     | C            | 0.913       | 0.986 | 11616         | 18         | 102  | 1   |   | 2 | 5          | 56   | 81   | 1.5 |   | 2 | 5 |
| <i>Petalura litorea</i> Theischinger, 1999              | E      | U            | 0.952       | 0.995 | 6620          | 39         | 62   | 2   |   | 1 | 5          | 60   | 66   | 4   |   | 2 | 5 |
| <i>Podopteryx selysi</i> (Förster, 1899)                | NE     | U            | 0.952       | 0.996 | 7570          | 72         | 39   | 1   |   | 1 | 5          | 96   | 19   | 2   | Y | 1 | 2 |
| <i>Potamarcha congener</i> (Rambur, 1842)               | N      | C            | 0.797       | 0.938 | 312330        | 9          | 250  | 1.5 |   | 1 | 5          | 13   | 248  | 2   |   | 1 | 5 |
| <i>Procordulia affinis</i> (Selys, 1871)                | W      | C            | 0.891       | 0.978 | 882546        | 64         | 1    | 0.5 | Y | 2 | 6          | 69   | 1    | 1.5 | Y | 0 | 2 |
| <i>Procordulia jacksoniensis</i> (Rambur, 1842)         | S      | C            | 0.721       | 0.937 | 209815        | 54         | 4    | 0   |   | 0 | 0          | 68   | 3    | 0.5 | Y | 0 | 6 |
| <i>Pseudagrion aureofrons</i> Tillyard, 1906            | C      | C            | 0.726       | 0.908 | 1288735       | 30         | 121  | 1   |   | 1 | 5          | 43   | 127  | 1.5 |   | 1 | 5 |
| <i>Pseudagrion cingillum</i> (Brauer, 1869)             | N      | C            | 0.953       | 0.989 | 212429        | 50         | 466  | 1.5 |   | 1 | 5          | 74   | 323  | 3   |   | 2 | 5 |
| <i>Pseudagrion ignifer</i> Tillyard, 1906               | E      | C            | 0.773       | 0.95  | 252537        | 28         | 48   | 1   |   | 1 | 5          | 42   | 53   | 1.5 |   | 1 | 5 |
| <i>Pseudagrion jedda</i> Watson & Theischinger, 1991    | N      | C            | 0.817       | 0.964 | 219876        | 39         | 132  | 2   |   | 1 | 5          | 80   | 46   | 2   |   | 4 | 3 |
| <i>Pseudagrion lucifer</i> Theischinger, 1997           | N      | C            | 0.832       | 0.954 | 174071        | 16         | 141  | 2   |   | 1 | 5          | 43   | 38   | 2   |   | 1 | 5 |
| <i>Pseudagrion microcephalum</i> (Rambur, 1842)         | C      | C            | 0.722       | 0.897 | 949461        | 14         | 136  | 1   |   | 1 | 5          | 33   | 157  | 1.5 |   | 1 | 5 |
| <i>Pseudocordulia circularis</i> Tillyard, 1909         | NE     | U            | 0.936       | 0.982 | 710           | 99         | 61   | 2   | Y | 3 | 1          | 99   | 62   | 2   | Y | 2 | 2 |
| <i>Pseudocordulia elliptica</i> Tillyard, 1913          | NE     | U            | 0.952       | 0.995 | 7631          | 47         | 34   | 1   |   | 1 | 5          | 70   | 8    | 2   | Y | 1 | 2 |
| <i>Rhadinosticta banksi</i> (Tillyard, 1913)            | N      | C            | 0.953       | 0.995 | 216370        | 42         | 227  | 1   |   | 1 | 5          | 68   | 90   | 1.5 |   | 2 | 5 |
| <i>Rhadinosticta simplex</i> (Martin, 1901)             | E      | C            | 0.656       | 0.89  | 675694        | 40         | 32   | 1   |   | 1 | 5          | 53   | 36   | 2   |   | 1 | 5 |



| Species                                                      | Region | Record Group | Model Score |       | Current Range | RCP85_2055 |      |     |   |   | RCP85_2085 |      |      |     |   |   |   |
|--------------------------------------------------------------|--------|--------------|-------------|-------|---------------|------------|------|-----|---|---|------------|------|------|-----|---|---|---|
|                                                              |        |              | TSS         | AUC   |               | Loss       | Gain | C   | S | D | V          | Loss | Gain | C   | S | D | V |
| <i>Rhodothemis lieftincki</i> Fraser, 1954                   | C      | C            | 0.703       | 0.901 | 355893        | 25         | 146  | 1   |   | 1 | 5          | 32   | 93   | 1.5 |   | 1 | 5 |
| <i>Rhyothemis braganza</i> Karsch, 1890                      | N      | C            | 0.737       | 0.94  | 303520        | 18         | 60   | 1.5 |   | 1 | 5          | 35   | 32   | 1.5 |   | 1 | 5 |
| <i>Rhyothemis graphiptera</i> (Rambur, 1842)                 | C      | C            | 0.697       | 0.881 | 737526        | 10         | 88   | 1   |   | 1 | 5          | 10   | 58   | 1.5 |   | 1 | 5 |
| <i>Rhyothemis phyllis</i> (Sulzer, 1776)                     | NE     | C            | 0.798       | 0.956 | 149396        | 9          | 79   | 1   |   | 1 | 5          | 20   | 123  | 2.5 |   | 1 | 5 |
| <i>Rhyothemis princeps</i> Kirby, 1894                       | NE     | C            | 0.873       | 0.968 | 22721         | 32         | 58   | 1   |   | 1 | 5          | 65   | 25   | 2.5 |   | 1 | 5 |
| <i>Rhyothemis resplendens</i> Selys, 1878                    | NE     | C            | 0.935       | 0.98  | 11576         | 35         | 32   | 1.5 |   | 0 | 5          | 52   | 32   | 3.5 |   | 0 | 5 |
| <i>Spinaeschna tripunctata</i> (Martin, 1901)                | S      | C            | 0.814       | 0.964 | 76305         | 31         | 72   | 1   |   | 1 | 5          | 52   | 64   | 2   |   | 1 | 5 |
| <i>Spinaeschna watsoni</i> Theischinger, 1982                | NE     | U            | 0.942       | 0.985 | 10299         | 66         | 4    | 1   | Y | 0 | 2          | 95   | 0    | 2   | Y | 2 | 2 |
| <i>Synlestes selysi</i> Tillyard, 1917                       | E      | C            | 0.802       | 0.957 | 89716         | 44         | 84   | 0.5 |   | 1 | 0          | 68   | 89   | 1.5 |   | 5 | 3 |
| <i>Synlestes tropicus</i> Tillyard, 1917                     | NE     | C            | 0.926       | 0.965 | 4248          | 77         | 36   | 1.5 |   | 1 | 5          | 97   | 12   | 2   | Y | 0 | 2 |
| <i>Synlestes weyersii</i> Selys, 1869                        | S      | C            | 0.755       | 0.922 | 261308        | 28         | 21   | 1   |   | 2 | 5          | 48   | 23   | 2   |   | 2 | 5 |
| <i>Synthemopsis gomphomacromioides</i> Tillyard, 1917        | S      | U            | 0.942       | 0.979 | 3784          | 94         | 17   | 1.5 | Y | 1 | 2          | 99   | 8    | 2.5 | Y | 1 | 2 |
| <i>Synthemis eustalacta</i> (Burmeister, 1839)               | S      | C            | 0.739       | 0.927 | 266770        | 43         | 25   | 0.5 |   | 1 | 0          | 67   | 24   | 1.5 | Y | 4 | 1 |
| <i>Synthemis tasmanica</i> Tillyard, 1910                    | S      | C            | 0.765       | 0.919 | 24177         | 58         | 20   | 0.5 |   | 1 | 0          | 76   | 8    | 2   | Y | 1 | 2 |
| <i>Teinobasis rufithorax</i> (Selys, 1877)                   | NE     | C            | 0.95        | 0.995 | 3435          | 41         | 122  | 1.5 |   | 1 | 5          | 65   | 162  | 3   |   | 1 | 5 |
| <i>Telephlebia brevicauda</i> Tillyard, 1916                 | S      | C            | 0.804       | 0.95  | 72187         | 47         | 50   | 0.5 |   | 1 | 0          | 63   | 46   | 1   |   | 4 | 3 |
| <i>Telephlebia cyclops</i> Tillyard, 1916                    | E      | C            | 0.862       | 0.961 | 50277         | 44         | 44   | 1.5 |   | 1 | 5          | 72   | 41   | 2.5 |   | 2 | 5 |
| <i>Telephlebia godeffroyi</i> Selys, 1883                    | E      | C            | 0.819       | 0.98  | 110546        | 50         | 58   | 2   |   | 1 | 5          | 71   | 55   | 2   |   | 3 | 3 |
| <i>Telephlebia tillyardi</i> Champion, 1916                  | NE     | U            | 0.942       | 0.99  | 9652          | 78         | 39   | 1   |   | 1 | 5          | 96   | 19   | 2   | Y | 1 | 2 |
| <i>Telephlebia tryoni</i> Tillyard, 1917                     | E      | U            | 0.953       | 0.99  | 7294          | 97         | 49   | 2   | Y | 5 | 1          | 100  | 39   | 3   | Y | 5 | 1 |
| <i>Tetrathemis irregularis cladophila</i> Tillyard, 1908     | NE     | C            | 0.937       | 0.986 | 9666          | 67         | 11   | 0.5 | Y | 0 | 6          | 91   | 7    | 2   | Y | 1 | 2 |
| <i>Tholymis tillarga</i> (Fabricius, 1798)                   | N      | C            | 0.824       | 0.988 | 113138        | 11         | 348  | 1.5 |   | 1 | 5          | 23   | 172  | 3   |   | 1 | 5 |
| <i>Tonyosynthemis claviculata</i> (Tillyard, 1909)           | NE     | U            | 0.932       | 0.977 | 6486          | 59         | 18   | 1   |   | 0 | 5          | 81   | 2    | 2   | Y | 0 | 2 |
| <i>Tonyosynthemis ofarelli</i> (Theischinger & Watson, 1986) | E      | U            | 0.934       | 0.991 | 16394         | 60         | 236  | 2.5 |   | 1 | 5          | 96   | 207  | 3   |   | 2 | 5 |
| <i>Tramea eurybia</i> Selys, 1878                            | E      | U            | 0.949       | 0.994 | 1396          | 81         | 181  | 3   |   | 5 | 3          | 83   | 233  | 4   |   | 5 | 3 |
| <i>Tramea loewii</i> Kaup, 1866                              | C      | C            | 0.762       | 0.893 | 1394206       | 3          | 153  | 1   |   | 1 | 5          | 3    | 197  | 1.5 |   | 1 | 5 |
| <i>Tramea stenoloba</i> (Watson, 1962)                       | C      | C            | 0.751       | 0.953 | 993288        | 52         | 62   | 1.5 |   | 3 | 3          | 62   | 70   | 2   |   | 2 | 5 |
| <i>Urothemis aliena</i> Selys, 1878                          | NE     | U            | 0.948       | 0.982 | 31745         | 41         | 52   | 1.5 |   | 3 | 3          | 58   | 62   | 3   |   | 1 | 5 |
| <i>Xanthagrion erythroneurum</i> (Selys, 1876)               | C      | C            | 0.722       | 0.822 | 3840167       | 29         | 12   | 1   |   | 0 | 5          | 29   | 18   | 1.5 |   | 1 | 5 |
| <i>Zephyrogomphus lateralis</i> (Selys, 1873)                | W      | C            | 0.954       | 0.992 | 18110         | 45         | 2    | 2   | Y | 0 | 2          | 69   | 1    | 2   | Y | 0 | 2 |
| <i>Zyxomma elgneri</i> Ris, 1913                             | C      | C            | 0.711       | 0.921 | 1184788       | 37         | 78   | 1   |   | 1 | 5          | 40   | 70   | 1.5 |   | 1 | 5 |

| Species                               | Region | Record Group | Model Score |       | Current Range | RCP85_2055 |      |     |   |   | RCP85_2085 |      |      |     |   |   |   |
|---------------------------------------|--------|--------------|-------------|-------|---------------|------------|------|-----|---|---|------------|------|------|-----|---|---|---|
|                                       |        |              | TSS         | AUC   |               | Loss       | Gain | C   | S | D | V          | Loss | Gain | C   | S | D | V |
| <i>Zyomma petiolatum</i> Rambur, 1842 | NE     | U            | 0.95        | 0.989 | 11191         | 22         | 61   | 1.5 |   | 1 | 5          | 45   | 40   | 3.5 |   | 1 | 5 |
